# Supplementary material
Source: HighWire-hosted journal article supplement (https://www.rcpjournals.org/highwire/filestream/13716/field_highwire_adjunct_files/0/Watson_Supplementary_material_S1.pdf)

Variability in oxygen prescribing and administration:  
what goes well and what could go wrong?

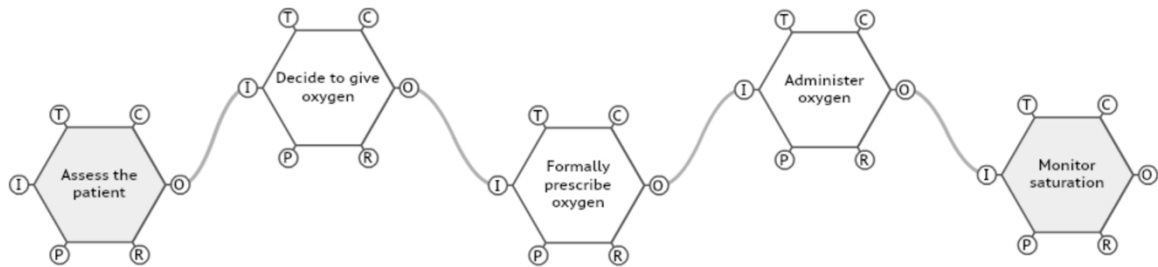

Supplement: Watson_Supplementary_material_S1.pdf [file Watson_Supplementary_material_S1.pdf]
